# Supplementary material
Source: Springer Nature journal article supplement (https://www.springermedizin.de/resource/supplementary/13075_2013_4088_MOESM2_ESM.pdf/9696004)

**A**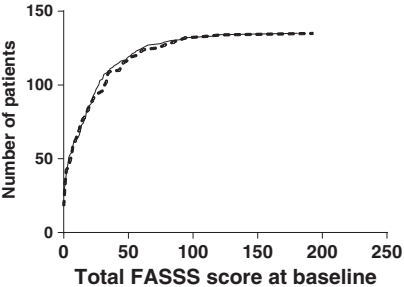**B**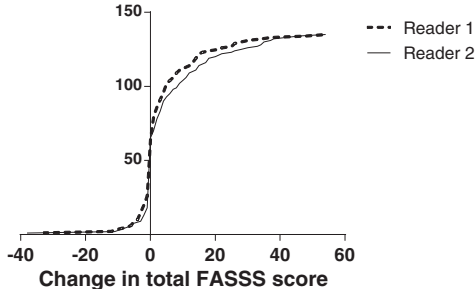

Supplement: MOESM2 [file 9696004]
